# Supplementary material
Source: publisher figshare collection journal article supplement (https://acs.figshare.com/ndownloader/files/7672138)
Supplement: Supplementary file 1 [file 7672138]

## Ultratrace Naked-eye Colorimetric Detection of $\text{Hg}^{2+}$ in Wastewater and Serum Utilizing Mercury-stimulated Peroxidase Mimetic Activity of Reduced Graphene Oxide-PEI-Pd Nanohybrids

Shouting Zhang<sup>a, b</sup>, Dongxu Zhang<sup>a</sup>, Xuehong Zhang<sup>a</sup>, Denghui Shang<sup>a</sup>, Zhonghua Xue<sup>a</sup>, Duoliang Shan<sup>a</sup>, Xiaoquan Lu<sup>a, b</sup>\*

<sup>a</sup>Key Laboratory of Bioelectrochemistry & Environmental Analysis of Gansu Province, College of Chemistry & Chemical Engineering, Northwest Normal University, Lanzhou 730070, P. R. China

<sup>b</sup>Department of chemistry, Tianjin University, Tianjin 300000, P. R. China

\*Phone: +86 0931-7971276. E-mail: [luxq@nwnu.edu.cn](mailto:luxq@nwnu.edu.cn)

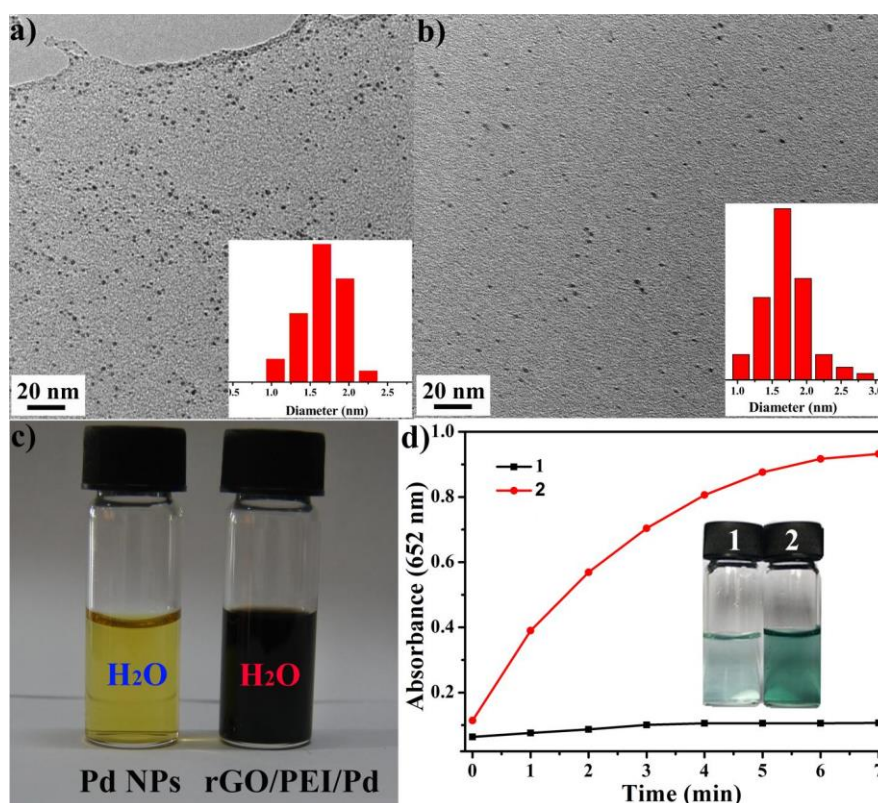

**Figure S1** (a) TEM images of rGO/PEI/Pd nanohybrids, inset: the nanoparticle size distribution of Pd NPs at rGO sheets. (b) TEM images of as-prepared 1.6~1.7 nm of the free Pd NPs, inset: the nanoparticle size distribution of Pd NPs at copper grid. (c) Photographs of Pd NPs and rGO/PEI/Pd nanohybrids in ddH<sub>2</sub>O. (d) Mercury-stimulated peroxidase mimetic activity of the free Pd NPs (black curve) and rGO/PEI/Pd nanohybrids (red curve). Under the optimal conditions, the concentration of Pd NPs is equal (black curve) with the of rGO/PEI/Pd nanohybrids. inset: Photographs of the mercury-stimulated peroxides mimetic activity of the free Pd NPs and rGO/PEI/Pd nanohybrids.

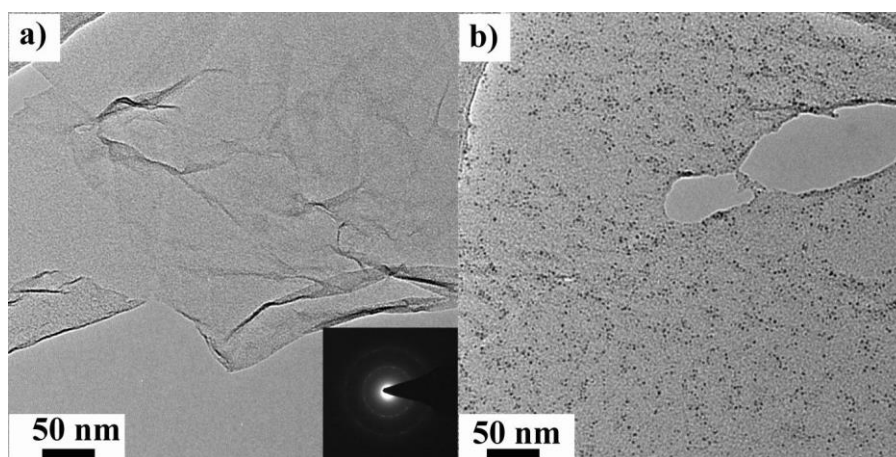

**Figure S2.** (a) TEM image of GO hybrid and SAED pattern of GO nanosheets. (b) TEM image of rGO/PEI/Pd nanohybrids.

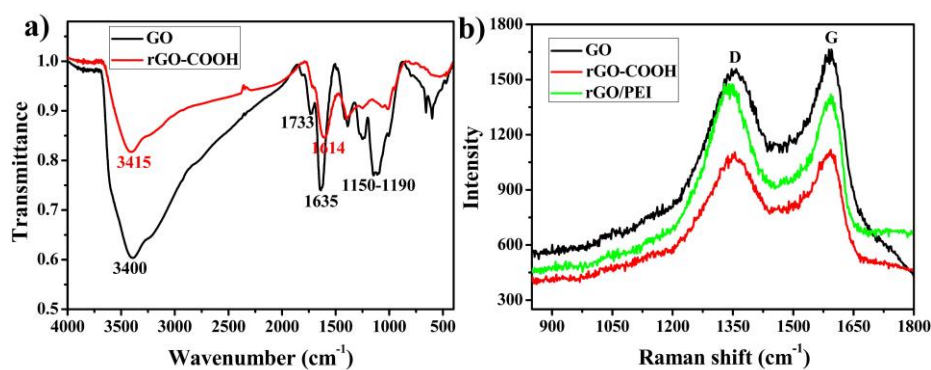

**Figure S3.** (a) Fourier transform infrared (FTIR) spectrum of GO and rGO-COOH. (b) Raman spectra of GO, rGO-COOH and rGO/PEI.

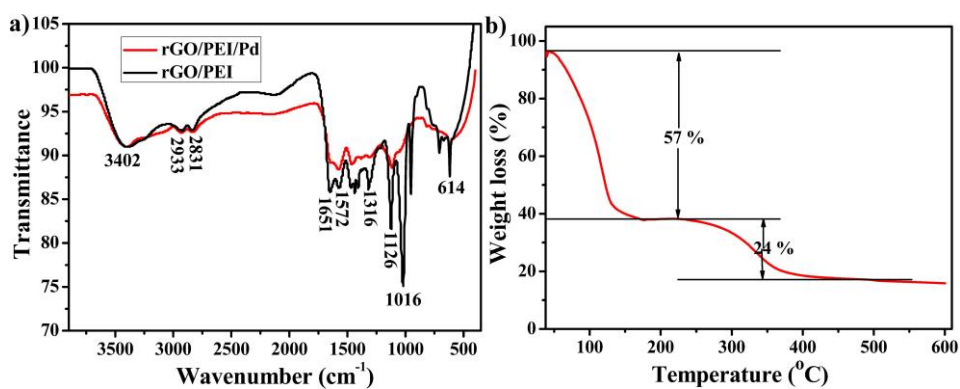

**Figure S4.** (a) Fourier transform infrared (FTIR) spectrum of rGO/PEI and rGO/PEI/Pd nanohybrids. (b) TG-DTA spectra of rGO/PEI.

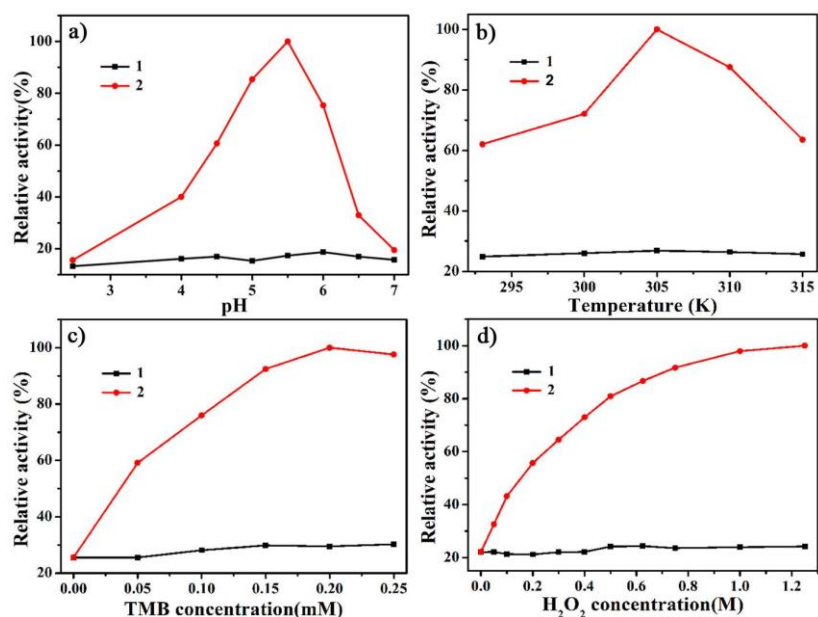

**Figure S5.** The mercury-stimulated peroxides-like catalytic activity of rGO/PEI/Pd nanohybrids is dependent on temperature (a), pH (b), TMB concentration (c) and  $H_2O_2$  concentration (d) in the absence (1) and presence (2) of  $Hg^{2+}$ . Experiments were carried out using 0.20 mM TMB, 0.50 M  $H_2O_2$ , 10  $\mu M$   $Hg^{2+}$  with the same amounts of the rGO/PEI/Pd nanohybrids (20 nM Pd NPs) in citric acid–disodium hydrogen phosphate buffer.

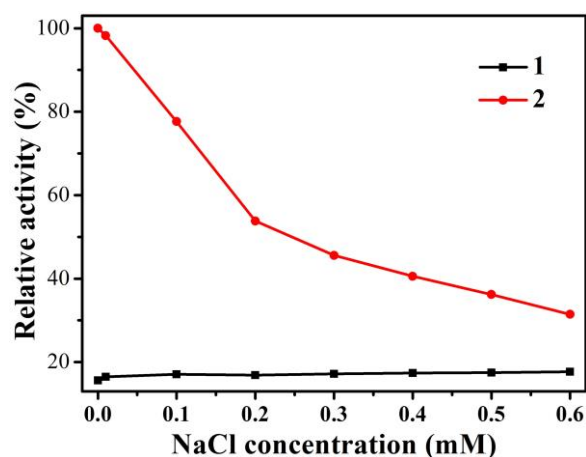

**Figure S6.** The mercury-stimulated peroxidase-like activity of the rGO/PEI/Pd nanohybrids in the presence of NaCl at various concentrations in the absence (1) and presence (2) of  $Hg^{2+}$ . Experiments were carried out using 0.20 mM TMB, 0.50 M  $H_2O_2$  in citric acid–phosphate buffer (25 mM pH 5.5) at 305 K.

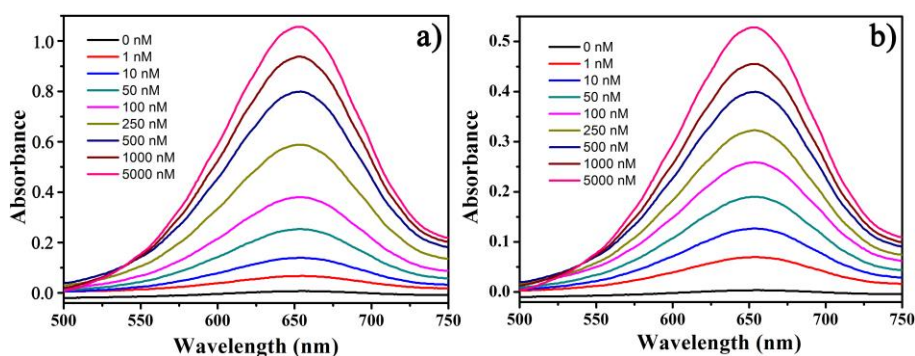

**Figure S7.** UV-Vis spectra for wastewater (a) and human serum (b) samples spiked with different concentrations of  $Hg^{2+}$  (from 1 nM to 5  $\mu$ M). Experiments were carried out using 0.20 mM TMB, 0.50 M  $H_2O_2$  in citric acid–phosphate buffer (25 mM pH 5.5) at 305 K, incubation time, 5 min.

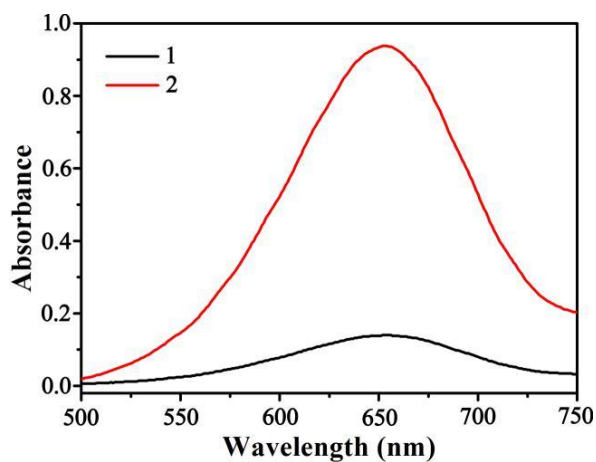

**Figure S8.** The absorbance profiles for the mercury-stimulated peroxides mimetic activity of the mixed Pd NPs+ GO + PEI (black line) and rGO/PEI/Pd nanohybrids (red line). Experiments were carried out using 0.20 mM TMB, 0.50 M  $H_2O_2$  in citric acid–phosphate buffer (25 mM pH 5.5) at 305 K, incubation time, 5 min.

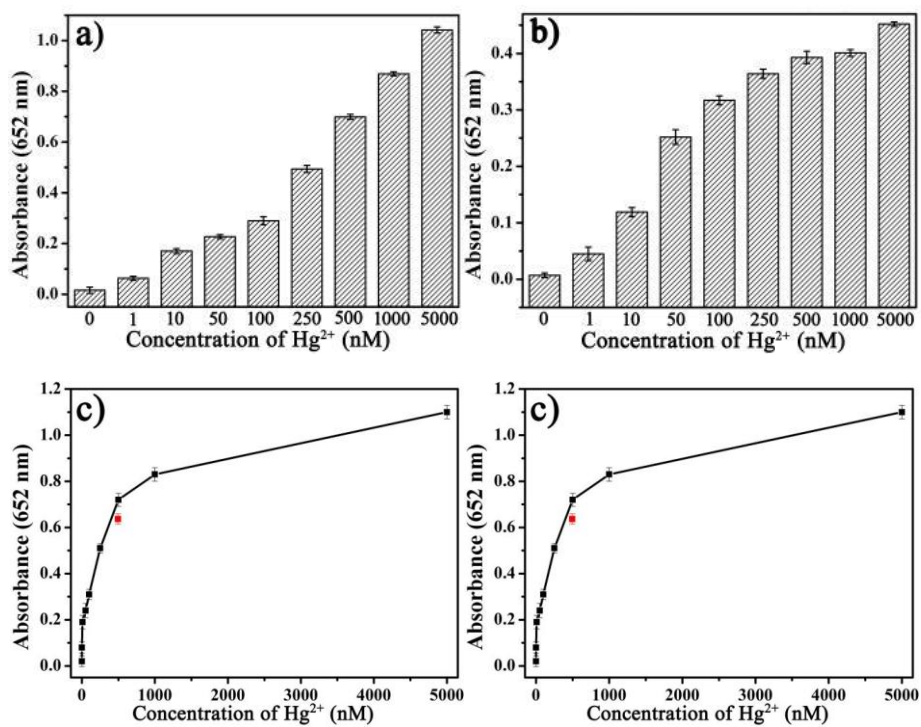

**Figure S9.** Responses of wastewater (a,c) and human serum (b,d) spiked with different concentration of  $Hg^{2+}$  by UV-vis detection. Red Square is the standard sample experimental data.
